# Supplementary material
Source: publisher figshare collection journal article supplement (https://acs.figshare.com/ndownloader/files/4454722)
Supplement: Supplementary file 1 [file 4454722]

## Supplementary Information for Cavitation in Metastable Fluids Confined to Nanoscale Pores

Christopher Rasmussen<sup>1</sup>, Aleksey Vishnyakov<sup>1</sup>, Matthias Thommes<sup>2,\*</sup>, Bernd Smarsly<sup>3</sup>,  
Freddy Kleitz<sup>4</sup>, and Alexander V. Neimark<sup>1,\*</sup>,

<sup>1</sup>Chemical and Biochemical Engineering, Rutgers University, Piscataway, NJ 08854, USA;

<sup>2</sup>Quantachrome Instruments, Boyton Beach, FL 33426, USA;

<sup>3</sup>Justus-Liebig University, Giessen, 35390, Germany, <sup>4</sup> Department of Chemistry, Université Laval, Quebec G1V  
0A6, Canada

E-mail: Matthias.Thommes@quantachrome.com, aneimark@rutgers.edu

1. Nitrogen adsorption/desorption isotherms in SBA-16 silica materials with pore diameters < 11 nm. These data were presented in Figure 2 with scaled and shifted adsorption coordinates. Notice the cavitation pressure (taken at the mid-point of the desorption transition) decreases with mean pore size.

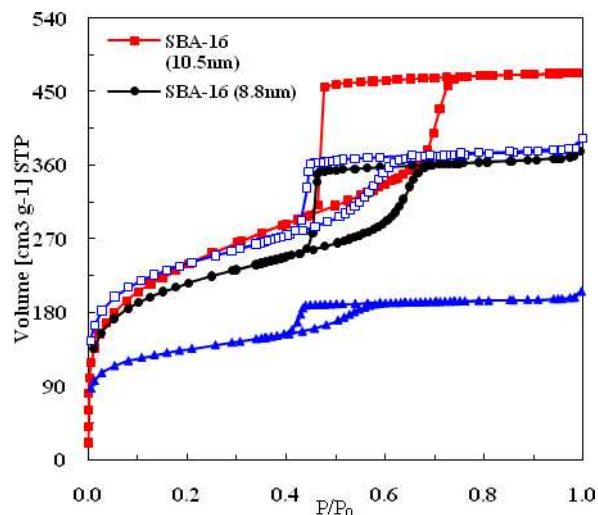

2. Density profiles from selected simulations. Densities measured at  $\mu/\varepsilon = -9.5$  ( $p/p_0 = 0.821$ ) and correspond to a liquid-filled pore. The red horizontal line is the value of the bulk density at the same chemical potential (pressure). Values were sampled equi-radially, so small radii have larger statistical error. Note that  $R = d$  (external)/2, where  $d$  (external) =  $d$  (accessible) + 0.18 nm. Sharp layering appears close to the adsorbing wall. In small pores, the oscillating layers are still present at considerable amplitude in the pore center. Larger pores exhibit a fluid of near bulk density at their centers.

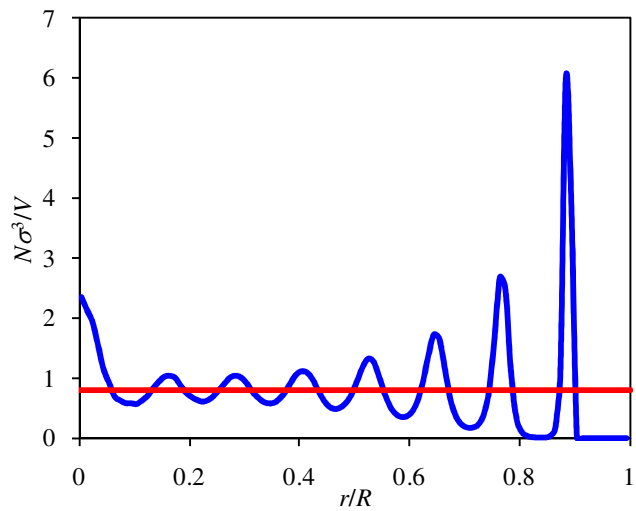

**a.** Pore,  $d$  (accessible) = 5.54 nm

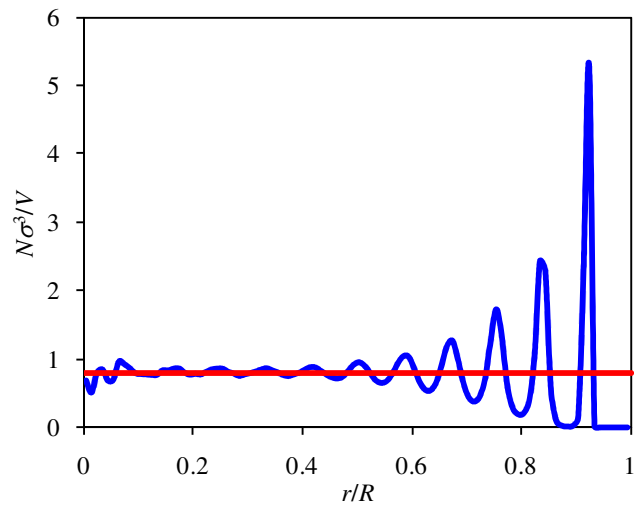

**b.** Pore,  $d$  (accessible) = 8.02 nm

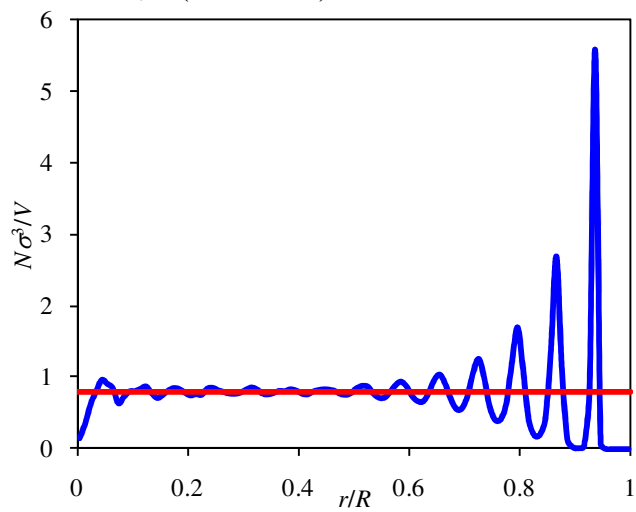

**c.** Pore,  $d$  (accessible) = 9.56 nm
